# Supplementary material for: Genital Evolution: Why Are Females Still Understudied?
Source: PLoS Biol. 2014 May 6;12(5):e1001851. doi: 10.1371/journal.pbio.1001851 (PMC4011675; doi:10.1371/journal.pbio.1001851)
Supplement: Table S1 — Database of papers considered in this analysis. (XLSX) [file pbio.1001851.s001.xlsx]

## Sheet: Sheet1
Article	Year	Model broad	Genus name	Species name	assumption (lock & key; cryptic female choice; sperm competition; sexual conflict; multiple; none)	genitalia (female only; male only; both)
A. Petrov, M. Hooge, S. Tyler, Comparative morphology of the bursal nozzles in acoels (Acoela, Acoelomorpha). Journal of Morphology 267, 634 (May, 2006).	2006	acoelomates	multiple		none	female
G. Purschke, J. Jordens, Male genital organs in the eulittoral meiofaunal polychaete Stygocapitella subterranea (Annelida, Parergodrilidae): ultrastructure, functional and phylogenetic significance. Zoomorphology 126, 283 (Dec, 2007).	2007	annelid	Stygocapitella	subterranea	lock & key	male
P. A. Olivero, C. I. Mattoni, A. V. Peretti, Morphometry and geographical variation of Bothriurns bonariensis (Scorpiones: Bothriuridae). Journal of Arachnology 40, 113 (2012).	2012	arachnid	Bothriurns	bonariensis	lock & key	male
A. V. Peretti, R. H. Willemart, Sexual coercion does not exclude luring behavior in the climbing camel-spider Oltacola chacoensis (Arachnida, Solifugae, Ammotrechidae). Journal of Ethology 25, 29 (Jan, 2007).	2007	arachnid	Oltacola	chacoensis	sexual selection	male
Di Palma A, Seeman O, Alberti G, 2013. Ultrastructure investigation of the secondary insemination system of the gamasid mite Hattena cometis domrow (Acari: Anactinotrichida: Ameroseiidae). Journal of Morphology 274:918-925	2013	arachnid	Hattena	cometis domrow	none	female
A. Jacob, I. Gantenbein, M. E. Braunwalder, W. Nentwig, C. Kropf, Morphology and function of male genitalia (Spermatophores) in Euscorpius italicus (Euscorpiidae, Scorpiones): Complex spermatophore structures enable safe sperm transfer. Journal of Morphology 260, 72 (Apr, 2004).	2004	arachnid	Euscorpius	italicus	cryptic female choice	both
A. V. Peretti, Functional morphology of spermatophores and female genitalia in bothriurid scorpions: genital courtship, coercion and other possible mechanisms. Journal of Zoology 261, 135 (Oct, 2003).	2003	arachnid	multiple		multiple	both
P. L. R. Brennan, C. J. Clark, R. O. Prum, Explosive eversion and functional morphology of the duck penis supports sexual conflict in waterfowl genitalia. Proceedings of the Royal Society B-Biological Sciences 277, 1309 (May, 2010).	2010	bird	Cairina	moschata	sexual conflict	male
P. L. R. Brennan, R. O. Prum, The limits of sexual conflict in the narrow sense: new insights from waterfowl biology. Philosophical Transactions of the Royal Society B-Biological Sciences 367, 2324 (Aug, 2012).	2012	bird	Anas	plathyrhynchos	sexual conflict	both
J. V. Briskie, R. Montgomerie, Sexual selection and the intromittent organ of birds. Journal of Avian Biology 28, 73 (Mar, 1997).	1997	bird	mutliple		sexual selection	male
M. R. Bakst, V. Akuffo, Morphology of the turkey vagina with and without an egg mass in the uterus. Poultry Science 88, 631 (Mar, 2009).	2009	bird	Meleagris	multiple	none	female
P. L. R. Brennan, T. R. Birkhead, K. Zyskowski, J. van der Waag, R. O. Prum, Independent evolutionary reductions of the phallus in basal birds. Journal of Avian Biology 39, 487 (Sep, 2008).	2008	bird	multiple		none	male
J. T. Thompson, J. R. Voight, Erectile tissue in an invertebrate animal: the Octopus copulatory organ. Journal of Zoology 261, 101 (Sep, 2003).	2003	cephalopod	Octopus	multiple	sperm competition	male
Lautenschlager AD, Brandis D, Storch V, Morphology and Function of the Reproductive System of Representatives of the Genus Uca. Journal of Morphology 271:1281-1299 (2010)	2010	crustacea	Uca	multiple	multiple	both
V. Jormalainen, S. M. Shuster, H. C. Wildey, Reproductive anatomy, precopulatory mate guarding, and paternity in the socorro isopod, Thermosphaeroma thermophilum. Marine and Freshwater Behaviour and Physiology 32, 39 (1999).	1999	crustacea	Thermosphaeroma	thermophilum	sexual conflict	both
C. A. Taylor, J. H. Knouft, Historical influences on genital morphology among sympatric species: gonopod evolution and reproductive isolation in the crayfish genus Orconectes (Cambaridae). Biological Journal of the Linnean Society 89, 1 (Sep, 2006).	2006	crustacea	Orconectes	multiple	lock & key	male
N. Kato, T. Miyashita, Sexual difference in modes of selection on the pleopods of crayfish (Decapoda : Astacoidea) revealed by the allometry of developmentally homologous traits. Canadian Journal of Zoology-Revue Canadienne De Zoologie 81, 971 (Jun, 2003).	2003	crustacea	Procambarus	mutliple	none	both
J. E. Bond, D. A. Beamer, M. C. Hedin, P. Sierwald, Gradual evolution of male genitalia in a sibling species complex of millipedes (Diplopoda : Spirobolida : Rhinocricidae : Anadenobolus). Invertebrate Systematics 17, 711 (2003).	2003	diplopoda	Anadenobolus	multiple	lock & key	male
T. Sota, T. Tanabe, Multiple speciation events in an arthropod with divergent evolution in sexual morphology. Proceedings of the Royal Society B-Biological Sciences 277, 689 (Mar, 2010).	2010	diplopoda	Parafontaria	tonominea	multiple	both
J. M. Wojcieszek, L. W. Simmons, EVIDENCE FOR STABILIZING SELECTION AND SLOW DIVERGENT EVOLUTION OF MALE GENITALIA IN A MILLIPEDE (ANTICHIROPUS VARIABILIS). Evolution 66, 1138 (Apr, 2012).	2012	diplopoda	Antichiropus	variabilis	lock & key	male
J. M. Wojcieszek, L. W. Simmons, Male genital morphology influences paternity success in the millipede Antichiropus variabilis. Behavioral Ecology and Sociobiology 65, 1843 (Oct, 2011).	2011	diplopoda	Antichiropus	variabilis	sexual selection	male
J. M. Wojcieszek, P. Austin, M. S. Harvey, L. W. Simmons, Micro-CT scanning provides insight into the functional morphology of millipede genitalia. Journal of Zoology 287, 91 (Jun, 2012).	2012	diplopoda	Antichiropus	variabilis	sexual selection	both
J. M. Wojcieszek, L. W. Simmons, Divergence in genital morphology may contribute to mechanical reproductive isolation in a millipede. Ecology and Evolution 3, 334 (Feb, 2013).	2013	diplopoda	Antichiropus	variabilis	lock & key	male
A. Tadler, Functional morphology of genitalia of four species of julidan millipedes (Diplopoda: Nemasomatidae: Julidae). Zoological Journal of the Linnean Society 118, 83 (Sep, 1996).	1996	diplopoda	multiple		sexual selection	both
J. L. Fitzpatrick, R. M. Kempster, T. S. Daly-Engel, S. P. Collin, J. P. Evans, Assessing the potential for post-copulatory sexual selection in elasmobranchs. Journal of Fish Biology 80, 1141 (Apr, 2012).	2012	elasmobranch	multiple		sexual selection	both
A. T. Kahn, B. Mautz, M. D. Jennions, Females prefer to associate with males with longer intromittent organs in mosquitofish. Biology Letters 6, 55 (Feb, 2010).	2010	fish	Gambusia	holbrooki	sexual selection	male
L. Horth, C. Binckley, R. Wilk, P. Reddy, A. Reddy, Color, Body Size, and Genitalia Size Are Correlated Traits in Eastern Mosquitofish (Gambusia holbrooki). Copeia, 196 (May, 2010).	2010	fish	Gambusia	holbrooki	none	male
C. D. Kelly, J. G. J. Godin, G. Abdallah, Geographical variation in the male intromittent organ of the Trinidadian guppy (Poecilia reticulata). Canadian Journal of Zoology-Revue Canadienne De Zoologie 78, 1674 (Sep, 2000).	2000	fish	Poecilia	reticulata	sexual selection	male
J. P. Evans et al., Intraspecific evidence from guppies for correlated patterns of male and female genital trait diversification. Proceedings of the Royal Society B-Biological Sciences 278, 2611 (Sep, 2011).	2011	fish	Poecilia	reticulata	sexual conflict	both
C. Gasparini, A. Pilastro, J. P. Evans, Male Genital Morphology and Its Influence on Female Mating Preferences and Paternity Success in Guppies. Plos One 6, (Jul, 2011).	2011	fish	Poecilia	reticulata	sexual conflict	male
L. Fishelson, C. C. Baldwin, P. A. Hastings, Gonad morphology, gametogenesis, and reproductive modes in fishes of the tribe starksiini(Teleostei, Blenniiformes). Journal of Morphology 274, 496 (May, 2013).	2013	fish	starksiini	multiple	none	both
R. B. Langerhans, C. A. Layman, T. J. DeWitt, Male genital size reflects a tradeoff between attracting mates and avoiding predators in two live-bearing fish species. Proceedings of the National Academy of Sciences of the United States of America 102, 7618 (May, 2005).	2005	fish	Gambusia	multiple	multiple	both
J. L. Leonard, J. A. Westfal, J. S. Pearse, Phally polymorphism and reproductive biology in Ariolimax (Ariolimax) buttoni (Pilsbry and Vanatta, 1896) (Stylommatophora : Arionidae). American Malacological Bulletin 23, 121 (Dec, 2007).	2007	gastropod	Ariolimax	buttoni	sexual selection	male
H. Baminger, M. Haase, Variation of distal genitalia in the simultaneously hermaphroditic land snail Arianta arbustorum (Pulmonata, Stylommatophora) caused by sexual selection. Biological Journal of the Linnean Society 71, 599 (Dec, 2000).	2000	gastropod	Arianta	arbustorum	multiple	both
K. Beese, K. Beier, B. Baur, Bursa tract diverticulum in the hermaphroditic land snail Arianta arbustorum (Stylommatophora : Helicidae): Morphology, function, and evolutionary implications. Journal of Morphology 267, 940 (Aug, 2006).	2006	gastropod	Arianta	arbustorum	sexual conflict	female
K. Beese, K. Beier, B. Baur, Coevolution of male and female reproductive traits in a simultaneously hermaphroditic land snail. Journal of Evolutionary Biology 19, 410 (Mar, 2006).	2006	gastropod	Arianta	arbustorum	multiple	both
K. Beese, B. Baur, Expandable spermatheca influences sperm storage in the simultaneously hermaphroditic snail Arianta arbustorum. Invertebrate Reproduction & Development 49, 93 (Aug, 2006).	2006	gastropod	Arianta	arbustorum	sexual selection	female
M. E. Garefalaki, A. Triantafyllidis, T. J. Abatzopoulos, A. Staikou, The outcome of sperm competition is affected by behavioural and anatomical reproductive traits in a simultaneously hermaphroditic land snail. Journal of Evolutionary Biology 23, 966 (May, 2010).	2010	gastropod	Cornu	aspersum	sperm competition	male
H. Nishi, T. Sota, Geographical divergence in the Japanese land snail Euhadra herklotsi inferred from its molecular phylogeny and genital characters. Zoological Science 24, 475 (May, 2007).	2007	gastropod	Euhadra	herklotsi	lock & key	both
M. Haase, A. Karlsson, Mating and the inferred function of the genital system of the nudibranch, Aeolidiella glauca (Gastropoda : Opisthobranchia : Aeolidioidea). Invertebrate Biology 119, 287 (2000).	2000	gastropod	Aeolidiella	glauca	none	both
Y. C. Kameda, A. Kawakita, M. Kato, Cryptic genetic divergence and associated morphological differentiation in the arboreal land snail Satsuma (Luchuhadra) largillierti (Camaenidae) endemic to the Ryukyu Archipelago, Japan. Molecular Phylogenetics and Evolution 45, 519 (Nov, 2007).	2007	gastropod	Satsuma (Luchuhadra)	largillierti	lock & key	both
K. Kimura, S. Chiba, Delayed spermatophore removal in the land snail Euhadra peliomphala. Biological Journal of the Linnean Society 108, 806 (Apr, 2013).	2013	gastropod	Euhadra	peliomphala	multiple	both
Y. Kameda, A. Kawakita, M. Kato, Reproductive Character Displacement in Genital Morphology in Satsuma Land Snails. American Naturalist 173, 689 (May, 2009).	2009	gastropod	Satsuma	multiple	lock & key	both
J. Sauer, B. Hausdorf, SEXUAL SELECTION IS INVOLVED IN SPECIATION IN A LAND SNAIL RADIATION ON CRETE. Evolution 63, 2535 (Oct, 2009).	2009	gastropod	Xerocrassa	multiple	sexual conflict	both
P. Van Riel, K. Jordaens, R. Verhagen, A. M. F. Martins, T. Backeljau, Genetic differentiation reflects geological history in the Azorean land snail, Leptaxis azorica. Heredity 91, 239 (Sep, 2003).	2003	gastropod	multiple		lock & key	both
K. Jordaens, L. Dillen, T. Backeljau, Shell shape and mating behaviour in pulmonate gastropods (Mollusca). Biological Journal of the Linnean Society 96, 306 (Feb, 2009).	2009	gastropod	multiple		none	both
P. G. Craze, L. A. Lace, Spatial ecology, habitat and speciation in the Porto Santan land snail genus Heterostoma. Biological Journal of the Linnean Society 71, 665 (Dec, 2000).	2000	gastropod	Heterostoma	multiple	multiple	male
P. G. Craze, L. A. Lace, Differences in physiological tolerance between coexisting taxa of the Madeiran land snail genus Heterostoma under controlled humidity and simulated rainfall. Journal of Zoology 256, 17 (Jan, 2002).	2002	gastropod	Heterostoma	multiple	multiple	male
J. Hollander, C. M. Smadja, R. K. Butlin, D. G. Reid, Genital divergence in sympatric sister snails. Journal of Evolutionary Biology 26, 210 (Jan, 2013).	2013	gastropod	multiple		lock & key	male
N. Anthes, N. K. Michiels, Reproductive morphology, mating behavior, and spawning ecology of cephalaspid sea slugs (Aglajidae and Gastropteridae). Invertebrate Biology 126, 335 (2007).	2007	gastropod	multiple		sexual selection	both
N. Anthes, H. Schulenburg, N. K. Michiels, Evolutionary links between reproductive morphology, ecology and mating behavior in opisthobranch gastropods. Evolution 62, 900 (Apr, 2008).	2008	gastropod	multiple		sexual selection	both
K. Beese, G. F. J. Armbruster, K. Beier, B. Baur, Evolution of female sperm-storage organs in the carrefour of stylommatophoran gastropods. Journal of Zoological Systematics and Evolutionary Research 47, 49 (Feb, 2009).	2009	gastropod	multiple		sexual selection	both
G. I. Holwell, Geographic variation in genital morphology of Ciulfina praying mantids. Journal of Zoology 276, 108 (Sep, 2008).	2008	insect	Ciulfina	multiple	sexual selection	male
A. Cordoba-Aguilar, A. Lopez-Valenzuela, O. Brunel, Allometry in damselfly ornamental and genital traits: solving some pitfalls of allometry and sexual selection. Genetica 138, 1141 (Dec, 2010).	2010	insect	Hetaerina	americana	sexual selection	both
E. Oneal, L. L. Knowles, Ecological selection as the cause and sexual differentiation as the consequence of species divergence? Proceedings of the Royal Society B-Biological Sciences 280, (Jan, 2013).	2013	insect	Amphiacusta	sanctaecrucis	lock & key	male
K. Grieshop, M. Polak, THE PRECOPULATORY FUNCTION OF MALE GENITAL SPINES IN DROSOPHILA ANANASSAE DOLESCHALL (DIPTERA: DROSOPHILIDAE) REVEALED BY LASER SURGERY. Evolution 66, 2637 (Aug, 2012).	2012	insect	Drosophila	ananassae	none	male
S. Saitoh, S. Miyai, H. Katakura, Geographical variation and diversification in the flightless leaf beetles of the Chrysolina angusticollis species complex (Chrysomelidae, Coleoptera) in northern Japan. Biological Journal of the Linnean Society 93, 557 (Mar, 2008).	2008	insect	Chrysolina	angusticollis	lock & key	male
L. W. Popple, G. H. Walter, A spatial analysis of the ecology and morphology of cicadas in the Pauropsalta annulata species complex (Hemiptera: Cicadidae). Biological Journal of the Linnean Society 101, 553 (Nov, 2010).	2012	insect	Pauropsalta	annulata	lock & key	male
D. R. Horton, T. M. Lewis, Size and shape differences in genitalia of males from sympatric and reproductively isolated populations of Anthocoris antevolens White (Heteroptera : Anthocoridae) in the Yakima Valley, Washington. Annals of the Entomological Society of America 98, 527 (Jul, 2005).	2005	insect	Anthocoris	antevolens	lock & key	male
D. R. Horton, M. A. Bayer, T. M. Lewis, Differences in mating behavior among three populations of Anthocoris antevolens (Heteroptera : Anthocoridae): A comparison of intra- and interpopulation crosses. Annals of the Entomological Society of America 98, 608 (Jul, 2005).	2005	insect	Anthocoris	antevolens	none	both
D. R. Horton, T. M. Lewis, Variation in Male and Female Genitalia Among Ten Species of North American Anthocoris (Hemiptera: Heteroptera: Anthocoridae). Annals of the Entomological Society of America 104, 1260 (Nov, 2011).	2011	insect	Anthocoris	antevolens	lock & key	both
M. Balint, P. C. Barnard, T. Schmitt, L. Ujvarosi, O. Popescu, Differentiation and speciation in mountain streams: a case study in the caddisfly Rhyacophila aquitanica (Trichoptera). Journal of Zoological Systematics and Evolutionary Research 46, 340 (Nov, 2008).	2008	insect	Rhyacophila	aquitanica	lock & key	male
N. Nagata, K. Kubota, Y. Takami, T. Sota, Historical divergence of mechanical isolation agents in the ground beetle Carabus arrowianus as revealed by phylogeographical analyses. Molecular Ecology 18, 1408 (Apr, 2009).	2009	insect	Carabus	arrowianus	lock & key	male
E. Le Roux, C. H. Scholtz, A. A. Kinahan, P. W. Bateman, Pre- and post-copulatory mate selection mechanisms in an African dung beetle, Circellium bacchus (Coleoptera : Scarabaeidae). Journal of Insect Behavior 21, 111 (May, 2008).	2008	insect	Circellium	bacchus	multiple	both
G. Pratt, T. K. Wood, GENITALIC ANALYSIS OF MALES AND FEMALES IN THE ENCHENOPA-BINOTATA (SAY) COMPLEX (MEMBRACIDAE, HOMOPTERA). Proceedings of the Entomological Society of Washington 95, 574 (Oct, 1993).	1993	insect	Enchenopa	binotata	lock & key	male
R. L. Rodriguez, N. Al-Wathiqui, Genotype x environment interaction is weaker in genitalia than in mating signals and body traits in Enchenopa treehoppers (Hemiptera: Membracidae). Genetica 139, 871 (Jul, 2011).	2011	insect	Enchenopa	binotata	sexual selection	male
R. L. Rodriguez, N. Al-Wathiqui, Causes of variation in sexual allometry: a case study with the mating signals and genitalia of Enchenopa treehoppers (Hemiptera Membracidae). Ethology Ecology & Evolution 24, 187 (Apr, 2012).	2012	insect	Enchenopa	binotata	sexual selection	male
R. L. Rodriguez, N. Al-Wathiqui, Genotype x environment interaction in the allometry of body, genitalia and signal traits in Enchenopa treehoppers (Hemiptera: Membracidae). Biological Journal of the Linnean Society 105, 187 (Jan, 2012).	2012	insect	Enchenopa	binotata	sexual selection	male
Y. Kamimura, Twin intromittent organs of Drosophila for traumatic insemination. Biology Letters 3, 401 (Aug, 2007).	2007	insect	Drosophila	bipectinata	sexual conflict	male
E. van Lieshout, M. A. Elgar, Longer exaggerated male genitalia confer defensive sperm-competitive benefits in an earwig. Evolutionary Ecology 25, 351 (Mar, 2011).	2011	insect	Euborellia	brunneri	sperm competition	male
E. van Lieshout, Male genital length and mating status differentially affect mating behaviour in an earwig. Behavioral Ecology and Sociobiology 65, 149 (Feb, 2011).	2011	insect	Euborellia	brunneri	sexual selection	male
Y. Okuzaki, Y. Takami, Y. Tsuchiya, T. Sota, Mating Behavior and the Function of the Male Genital Spine in the Ground Beetle Carabus clathratus. Zoological Science 29, 428 (Jul, 2012).	2012	insect	Carabus	clathratus	mechanical fit	both
C. S. Henry, S. J. Brooks, P. Duelli, J. B. Johnson, Discovering the true Chrysoperla carnea (Insecta : Neuroptera : Chrysopidae) using song analysis, morphology, and ecology. Annals of the Entomological Society of America 95, 172 (Mar, 2002).	2002	insect	Chrysoperla	carnea	lock & key	male
L. Arnaud, E. Haubruge, M. J. G. Gage, Morphology of Tribolium castaneum male genitalia and its possible role in sperm competition and cryptic female choice. Belgian Journal of Zoology 131, 111 (Jul, 2001).	2001	insect	Tribolium	castaneum	sexual selection	both
E. Haubruge, L. Arnaud, J. Mignon, M. J. G. Gage, Fertilization by proxy: rival sperm removal and translocation in a beetle. Proceedings of the Royal Society B-Biological Sciences 266, 1183 (Jun, 1999).	1999	insect	Tribolium	castaneum	sperm competition	both
G. Sakurai, C. Himuro, E. Kasuya, Intra-specific variation in the morphology and the benefit of large genital sclerites of males in the adzuki bean beetle (Callosobruchus chinensis). Journal of Evolutionary Biology 25, 1291 (Jul, 2012).	2012	insect	Callosobruchus	chinensis	sexual selection	male
P. Tryjanowski, Z. Adamski, M. Dylewska, L. Bulkail, L. Rozsa, DEMOGRAPHIC CORRELATES OF SEXUAL SIZE DIMORPHISM AND MALE GENITAL SIZE IN THE LICE PHILOPTERUS COARCTATUS. Journal of Parasitology 95, 1120 (Oct, 2009).	2009	insect	Philopterus	coarctatus	sexual selection	male
Y. Matsumura, K. Yoshizawa, Insertion and withdrawal of extremely elongated genitalia: a simple mechanism with a highly modified morphology in the leaf beetle, Lema coronata. Biological Journal of the Linnean Society 99, 512 (Mar, 2010).	2010	insect	Lema	coronata	lock & key	male
M. Forster, C. Gack, K. Peschke, Morphology and function of the spermatophore in the rove beetle, Aleochara curtula (Coleoptera : Staphylinidae). Zoology-Analysis of Complex Systems 101, 34 (1998).	1998	insect	Aleochara	curtula	sperm competition	male
W. G. Eberhard, Sexual morphology of male Sepsis cynipsea (Diptera : Sepsidae): lack of support for lock-and-key and sexually antagonistic morphological coevolution hypotheses. Canadian Entomologist 137, 551 (Sep-Oct, 2005).	2005	insect	Sepsis	cynipsea	cryptic female choice	both
W. U. Blanckenhorn, U. R. S. Kraushaar, Y. Teuschl, C. Reim, Sexual selection on morphological and physiological traits and fluctuating asymmetry in the black scavenger fly Sepsis cynipsea. Journal of Evolutionary Biology 17, 629 (May, 2004).	2004	insect	Sepsis	cynipsea	cryptic female choice	male
W. G. Eberhard, The relation between aggressive and sexual behavior and allometry in Palaeosepsis dentatiformis Flies (Diptera : Sepsidae). Journal of the Kansas Entomological Society 75, 317 (Oct, 2002).	2002	insect	Palaeosepsis	dentatiformis	cryptic female choice	both
W. G. Eberhard, F. Pereira, Functional morphology of male genitalic surstyli in the dungflies Achisepsis diversiformis and A-ecalcarata (Diptera: Sepsidae). Journal of the Kansas Entomological Society 69, 43 (Oct, 1996).	1996	insect	Achisepsis	diversiformis	sexual selection	both
M. Polak, A. Rashed, Microscale laser surgery reveals adaptive function of male intromittent genitalia. Proceedings of the Royal Society B-Biological Sciences 277, 1371 (May, 2010).	2010	insect	Drosophila	bipectinata	mechanical fit	male
S. L. Higgins, D. J. Hosken, N. Wedell, Phenotypic and genetic variation in male genitalia in the seedbug, Lygaeus equestris (Heteroptera). Biological Journal of the Linnean Society 98, 400 (Oct, 2009).	2009	insect	Lygaeus	equestris	sexual selection	male
W. G. Eberhard, Genitalic behavior in Hybosciara gigantea (Diptera : Sciaridae) and the evolution of species-specific genitalia. Journal of the Kansas Entomological Society 74, 1 (Jan, 2001).	2001	insect	Hybosciara	gigantea	cryptic female choice	both
C. S. Han, P. G. Jablonski, Female Genitalia Concealment Promotes Intimate Male Courtship in a Water Strider. Plos One 4, (Jun, 2009).	2009	insect	Gerris	gracilicornis	sexual conflict	female
C. S. Han, P. G. Jablonski, Male water striders attract predators to intimidate females into copulation. Nature Communications 1, (Aug, 2010).	2010	insect	Gerris	gracilicornis	sexual conflict	both
A. C. Rivera, J. A. Andres, A. Cordoba-Aguilar, C. Utzeri, Postmating sexual selection: Allopatric evolution of sperm competition mechanisms and genital morphology in calopterygid damselflies (Insecta : Odonata). Evolution 58, 349 (Feb, 2004).	2004	insect	Calopteryx	haemorrhoidalis	sperm competition	both
A. Cordoba-Aguilar, M. T. Siva-Jothy, Sperm displacement ability in Calopteryx haemorrhoidalis (Vander linden): Male and female roles, male limits in performance, and female neural control (Zygoptera : Calopterygidae). Odonatologica 33, 245 (Sep, 2004).	2004	insect	Calopteryx	haemorrhoidalis	sperm competition	both
A. Cordoba-Aguilar, Male copulatory sensory stimulation induces female ejection of rival sperm in a damselfly. Proceedings of the Royal Society B-Biological Sciences 266, 779 (Apr, 1999).	1999	insect	Calopteryx	haemorrhoidalis asturica	cryptic female choice	both
A. Cordoba-Aguilar, Sperm displacement ability in the damselfly Calopteryx haemorrhoidalis asturica Ocharan: No effect of male age, territorial status, copulation duration and syn-copulatory behaviour (Zygoptera : Calopterygidae). Odonatologica 30, 375 (Dec, 2001).	2001	insect	Calopteryx	haemorrhoidalis asturica	sperm competition	male
M. Polihronakis, Morphometric analysis of intraspecific shape variation in male and female genitalia of Phyllophaga hirticula (Coleoptera : Scarabaeidae : Melolonthinae). Annals of the Entomological Society of America 99, 144 (Jan, 2006).	2006	insect	Phyllophaga	hirticula	sexual selection	both
M. Polihronakis, Hierarchical comparative analysis of genetic and genitalic geographical structure: testing patterns of male and female genital evolution in the scarab beetle Phyllophaga hirticula (Coleoptera: Scarabaeidae). Biological Journal of the Linnean Society 96, 135 (Jan, 2009).	2009	insect	Phyllophaga	hirticula	multiple	both
L. H. Yang, Q. Wang, Precopulation sexual selection in Nysius huttoni White (Heteroptera : Lygaeidae) in relation to morphometric traits. Journal of Insect Behavior 17, 695 (Sep, 2004).	2004	insect	Nysius	huttoni	sexual selection	male
A. Tadler, Selection of a conspicuous male genitalic trait in the seedbug Lygaeus simulans. Proceedings of the Royal Society B-Biological Sciences 266, 1773 (Sep, 1999).	1999	insect	Lygaeus	imulans	cryptic female choice	male
A. Tadler, H. L. Nemeschkal, G. Pass, Selection of male traits during and after copulation in the seedbug Lygaeus simulans (Heteroptera, Lygaeidae). Biological Journal of the Linnean Society 68, 471 (Nov, 1999).	1999	insect	Lygaeus	imulans	none	male
H. Tatsuta, K. Fujimoto, K. Mizota, K. Reinhardt, S. I. Akimoto, Distinctive developmental variability of genital parts in the sexually dimorphic beetle, Prosopocoilus inclinatus (Coleoptera : Lucanidae). Biological Journal of the Linnean Society 90, 573 (Apr, 2007).	2007	insect	Prosopocoilus	inclinatu	sexual selection	both
J. C. Perry, L. Rowe, SEXUAL CONFLICT AND ANTAGONISTIC COEVOLUTION ACROSS WATER STRIDER POPULATIONS. Evolution 66, 544 (Feb, 2012).	2012	insect	Gerris	incognitus	sexual conflict	both
G. Arnqvist, R. Thornhill, L. Rowe, Evolution of animal genitalia: morphological correlates of fitness components in a water strider. Journal of Evolutionary Biology 10, 613 (Jul, 1997).	1997	insect	Gerris	incognitus	multiple	male
G. Arnqvist, R. Thornhill, Evolution of animal genitalia: patterns of phenotypic and genotypic variation and condition dependence of genital and non-genital morphology in water strider (Heteroptera : Gerridae : Insecta). Genetics Research 71, 193 (Jun, 1998).	1998	insect	Gerris	incognitus	multiple	male
Y. Takami, Experimental analysis of the effect of genital morphology on insemination success in the ground beetle Carabus insulicola (Coleoptera Carabidae). Ethology Ecology & Evolution 15, 51 (Apr, 2003).	2003	insect	Carabus	insulicola	sperm competition	both
K. Kubota, K. Miyazaki, S. Ebihara, Y. Takami, Mechanical reproductive isolation via divergent genital morphology between Carabus insulicola and C-esakii with implications in species coexistence. Population Ecology 55, 35 (Jan, 2013).	2013	insect	Carabus	insulicola	lock & key	both
L. Dapporto, C. Bruschini, Invading a refugium: post glacial replacement of the ancestral lineage of a Nymphalid butterfly in the West Mediterranean. Organisms Diversity & Evolution 12, 39 (Mar, 2012).	2012	insect	Maniola	jurtina	lock & key	male
G. I. Holwell, C. Winnick, T. Tregenza, M. E. Herberstein, Genital shape correlates with sperm transfer success in the praying mantis Ciulfina klassi (Insecta: Mantodea). Behavioral Ecology and Sociobiology 64, 617 (Mar, 2010).	2010	insect	Ciulfina	klassi	sexual selection	male
J. Xu, Q. Wang, Form and nature of precopulatory sexual selection in both sexes of a moth. Naturwissenschaften 97, 617 (Jul, 2010).	2010	insect	Ephestia	kuehniella	sexual selection	male
I. Danielsson, C. Askenmo, Male genital traits and mating interval affect male fertilization success in the water strider Gerris lacustris. Behavioral Ecology and Sociobiology 46, 149 (Aug, 1999).	1999	insect	Gerris	lacustris	sexual selection	male
G. Arnqvist, I. Danielsson, Copulatory behavior, genital morphology, and male fertilization success in water striders. Evolution 53, 147 (Feb, 1999).	1999	insect	Gerris	lateralis	sexual conflict	male
A. Schulte-Hostedde, Y. Alarie, Morphological patterns of sexual selection in the diving beetle Graphoderus liberus. Evolutionary Ecology Research 8, 891 (Jul, 2006).	2006	insect	Graphoderus	liberu	sexual selection	male
H. J. Song, J. W. Wenzel, Mosaic pattern of genital divergence in three populations of Schistocerca lineata Scudder, 1899 (Orthoptera : Acrididae : Cyrtacanthacridinae). Biological Journal of the Linnean Society 94, 289 (Jun, 2008).	2008	insect	Schistocerca	lineata	multiple	male
E. Bath, N. Tatarnic, R. Bonduriansky, Asymmetric reproductive isolation and interference in neriid flies: the roles of genital morphology and behaviour. Animal Behaviour 84, 1331 (Dec, 2012).	2012	insect	Telostylinus	multiple	multiple	both
G. I. Holwell, M. E. Herberstein, Chirally Dimorphic Male Genitalia in Praying Mantids (Ciulfina: Liturgusidae). Journal of Morphology 271, 1176 (Oct, 2010).	2010	insect	ciulfina	liturgusidae	sexual selection	male
K. Mikkola, EVIDENCE FOR LOCK-AND-KEY MECHANISMS IN THE INTERNAL GENITALIA OF THE APAMEA MOTHS (LEPIDOPTERA, NOCTUIDAE). Systematic Entomology 17, 145 (Apr, 1992).	1992	insect	Apamea	lots	lock & key	both
K. Mikkola, The lock-and-key mechanisms of the internal genitalia of the Noctuidae (Lepidoptera): How are they selected for? European Journal of Entomology 105, 13 (2008).	2008	insect	Noctuidae	multiple	lock & key	both
M. Mutanen, S. Rytkonen, J. Linden, J. Sinkkonen, Male genital variation in a moth Pammene luedersiana (Lepidoptera : Tortricidae). European Journal of Entomology 104, 259 (Apr, 2007).	2007	insect	Pammene	luedersiana	lock & key	male
L. Cayetano, A. A. Maklakov, R. C. Brooks, R. Bonduriansky, EVOLUTION OF MALE AND FEMALE GENITALIA FOLLOWING RELEASE FROM SEXUAL SELECTION. Evolution 65, 2171 (Aug, 2011).	2011	insect	Callosobrunchus	maculatus	sexual conflict	both
L. Gay et al., The genetic architecture of sexual conflict: male harm and female resistance in Callosobruchus maculatus. Journal of Evolutionary Biology 24, 449 (Feb, 2011).	2011	insect	Callosobruchus	maculatus	sexual conflict	both
L. Gay, D. J. Hosken, P. Eady, R. Vasudev, T. Tregenza, THE EVOLUTION OF HARM-EFFECT OF SEXUAL CONFLICTS AND POPULATION SIZE. Evolution 65, 725 (Mar, 2011).	2011	insect	Callosobruchus	maculatus	sexual conflict	both
C. Hotzy, M. Polak, J. L. Ronn, G. Arnqvist, Phenotypic Engineering Unveils the Function of Genital Morphology. Current Biology 22, 2258 (Dec, 2012).	2012	insect	Callosobruchus	maculatus	sexual selection	both
L. Gay, P. E. Eady, R. Vasudev, D. J. Hosken, T. Tregenza, Costly sexual harassment in a beetle. Physiological Entomology 34, 86 (Mar, 2009).	2009	insect	Callosobruchus	maculatus	sexual conflict	male
C. Hotzy, G. Arnqvist, Sperm Competition Favors Harmful Males in Seed Beetles. Current Biology 19, 404 (Mar, 2009).	2009	insect	Callosobruchus	maculatus	sexual selection	male
H. Tatsuta, K. Mizota, S. I. Akimoto, Allometric patterns of heads and genitalia in the stag beetle Lucanus maculifemoratus (Coleoptera : Lucanidae). Annals of the Entomological Society of America 94, 462 (May, 2001).	2001	insect	Lucanus	maculifemoratus	sexual selection	male
V. A. Lukhtanov et al., Reinforcement of pre-zygotic isolation and karyotype evolution in Agrodiaetus butterflies. Nature 436, 385 (Jul, 2005).	2005	insect	Agrodiaetus	multiple	lock & key	male
M. A. McPeek, L. Shen, H. Farid, THE CORRELATED EVOLUTION OF THREE-DIMENSIONAL REPRODUCTIVE STRUCTURES BETWEEN MALE AND FEMALE DAMSELFLIES. Evolution 63, 73 (Jan, 2009).	2009	insect	Enallagma	multiple	lock & key	both
J. K. Liebherr, Taxonomic revision of Hawaiian Bembidion Latreille (Coleoptera : Carabidae : Bembidiini) with a discussion of their reductive and derivative evolutionary specializations. Annals of Carnegie Museum 77, 31 (Jul, 2008).	2008	insect	Bembidion	multiple	lock & key	both
A. L. M. Macagno et al., Shape - but Not Size - Codivergence between Male and Female Copulatory Structures in Onthophagus Beetles. Plos One 6, (Dec, 2011).	2011	insect	Onthophagus	multiple	multiple	both
Y. Matsumura, K. Yoshizawa, Homology of the internal sac components in the leaf beetle subfamily criocerinae and evolutionary novelties related to the extremely elongated flagellum. Journal of Morphology 273, 507 (May, 2012).	2012	insect	Criocerinae	multiple	none	male
L. K. Lucas, J. A. Fordyce, C. C. Nice, Patterns of genitalic morphology around suture zones in North American Lycaeides (Lepidoptera : Lycaenidae): Implications for taxonomy and historical biogeography. Annals of the Entomological Society of America 101, 172 (Jan, 2008).	2008	insect	lycenidae	multiple	lock & key	male
M. Moreno-Garcia, C. Cordero, On the function of male genital claspers in Stenomacra marginella (Heteroptera : Largidae). Journal of Ethology 26, 255 (May, 2008).	2008	insect	Stenomacra	marginella	none	male
C. A. C. Andrade, L. M. Hatadani, L. B. Klaczko, Phenotypic plasticity of the aedeagus of Drosophila mediopunctata: Effect of the temperature. Journal of Thermal Biology 30, 518 (Oct, 2005).	2005	insect	Drosophila	mediopunctata	multiple	male
C. A. C. Andrade, R. D. Vieira, G. Ananina, L. B. Klaczko, Evolution of the male genitalia: morphological variation of the aedeagi in a natural population of Drosophila mediopunctata. Genetica 135, 13 (Jan, 2009).	2009	insect	Drosophila	mediopunctata	multiple	male
A. Kopp, R. M. Graze, S. Z. Xu, S. B. Carroll, S. V. Nuzhdin, Quantitative trait loci responsible for variation in sexually dimorphic traits in Drosophila melanogaster. Genetics 163, 771 (Feb, 2003).	2003	insect	Drosophila	melanogaster	sexual selection	both
A. Kopp, J. R. True, Evolution of male sexual characters in the Oriental Drosophila melanogaster species group. Evolution & Development 4, 278 (Jul-Aug, 2002).	2002	insect	Drosophila	melanogaster	sexual selection	male
Y. Kamimura, Copulation anatomy of Drosophila melanogaster (Diptera: Drosophilidae): wound-making organs and their possible roles. Zoomorphology 129, 163 (Aug, 2010).	2010	insect	Drosophila	melanogaster	sexual conflict	both
Y. Kamimura, H. Mitsumoto, Comparative copulation anatomy of the Drosophila melanogaster species complex (Diptera: Drosophilidae). Entomological Science 14, 399 (Oct, 2011).	2011	insect	Drosophila	melanogaster	lock & key	male
J. P. Masly, J. E. Dalton, S. Srivastava, L. Chen, M. N. Arbeitman, The Genetic Basis of Rapidly Evolving Male Genital Morphology in Drosophila. Genetics 189, 357 (Sep, 2011).	2011	insect	Drosophila	melanogaster	none	male
C. L. McNeil, C. L. Bain, S. J. Macdonald, Multiple Quantitative Trait Loci Influence the Shape of a Male-Specific Genital Structure in Drosophila melanogaster. G3-Genes Genomes Genetics 1, 343 (Oct, 2011).	2011	insect	Drosophila	melanogaster	none	male
A. P. Dreyer, A. W. Shingleton, The Effect of Genetic and Environmental Variation on Genital Size in Male Drosophila: Canalized but Developmentally Unstable. Plos One 6, (Dec, 2011).	2011	insect	Drosophila	melanogaster	none	male
A. Civetta, R. S. Singh, Sex and speciation: Genetic architecture and evolutionary potential of sexual versus nonsexual traits in the sibling species of the Drosophila melanogaster complex. Evolution 52, 1080 (Aug, 1998).	1998	insect	Drosophila	melanogaster complex	sexual selection	male
M. R. Orr, A. H. Porter, T. A. Mousseau, H. Dingle, MOLECULAR AND MORPHOLOGICAL EVIDENCE FOR HYBRIDIZATION BETWEEN 2 ECOLOGICALLY DISTINCT GRASSHOPPERS (MELANOPLUS-SANGUINIPES AND M-DEVASTATOR) IN CALIFORNIA. Heredity 72, 42 (Jan, 1994).	1994	insect	Melanoplus	multiple	lock & key	male
J. Woyke, The mating sign of queen bees originates from two drones and the process of multiple mating in honey bees. Journal of Apicultural Research 50, 272 (2011).	2011	insect	Apis	melifera	none	both
A. P. Estrada, R. Prieto, Genetic variation in isolated populations of Drosophila mercatorum (Diptera: Drosophilidae) in semi-arid ecosystems. Revista Colombiana De Entomologia 37, 318 (Jul-Dec, 2011).	2011	insect	Drosophila	mercatorum	lock & key	male
S. R. Daniels, H. Ruhberg, Molecular and morphological variation in a South African velvet worm Peripatopsis moseleyi (Onychophora, Peripatopsidae): evidence for cryptic speciation. Journal of Zoology 282, 171 (Nov, 2010).	2010	onychophoran	Peripatopsis	moseleyi	lock & key	male
M. P. Richmond, S. Johnson, T. A. Markow, Evolution of reproductive morphology among recently diverged taxa in the Drosophila mojavensis species cluster. Ecology and Evolution 2, 397 (Feb, 2012).	2012	insect	Drosophila	mojavensis	lock & key	male
J. Routto et al., The extent of variation in male song, wing and genital characters among allopatric Drosophila montana populations. Journal of Evolutionary Biology 20, 1591 (Jul, 2007).	2007	insect	Drosophila	montana	sexual selection	male
D. Mazzi, J. Kesaniemi, A. Hoikkala, K. Klappert, Sexual conflict over the duration of copulation in Drosophila montana: why is longer better? Bmc Evolutionary Biology 9, (Jun, 2009).	2009	insect	Drosophila	montana	sexual conflict	both
M. A. Schafer et al., Multiple quantitative trait loci influence intra-specific variation in genital morphology between phylogenetically distinct lines of Drosophila montana. Journal of Evolutionary Biology 24, 1879 (Sep, 2011).	2011	insect	Drosophila	montana	pleiotropy	male
L. L. Knowles, Tests of Pleistocene speciation in montane grasshoppers (genus Melanoplus) from the sky islands of western North America. Evolution 54, 1337 (Aug, 2000).	2000	insect	Melanoplus	multiple	sexual selection	male
S. Jagadeeshan, R. S. Singh, A time-sequence functional analysis of mating behaviour and genital coupling in Drosophila: role of cryptic female choice and male sex-drive in the evolution of male genitalia. Journal of Evolutionary Biology 19, 1058 (Jul, 2006).	2006	insect	Drosophila	multiple	cryptic female choice	both
H. C. Proctor, R. L. Baker, D. T. Gwynne, Mating behaviour and spermatophore morphology: A comparative test of the female-choice hypothesis. Canadian Journal of Zoology-Revue Canadienne De Zoologie 73, 2010 (Nov, 1995).	1995	insect	multiple		multiple	male
N. Puniamoorthy, M. Kotrba, R. Meier, Unlocking the "Black box": internal female genitalia in Sepsidae (Diptera) evolve fast and are species-specific. Bmc Evolutionary Biology 10, (Sep, 2010).	2010	insect	multiple		sexual selection	female
S. L. Keffer, Morphology and evolution of waterscorpion male genitalia (Heteroptera : Nepidae). Systematic Entomology 29, 142 (Apr, 2004).	2004	insect	multiple		sexual selection	male
D. J. Hosken, A. M. Minder, P. I. Ward, Male genital allometry in scathophagidae (Diptera). Evolutionary Ecology 19, 501 (Sep, 2005).	2005	insect	multiple		sexual selection	male
Robinson JV, Novak KL, 1997. The relationship between mating system and penis morphology in ischnuran damselflies (Odonata: Coenagrionidae). Biological Journal of the Linnean Society 60:187-200	1997	insect	multiple		sperm competition	male
H. Alonsopimentel, L. P. Tolbert, W. B. Heed, ULTRASTRUCTURAL EXAMINATION OF THE INSEMINATION REACTION IN DROSOPHILA. Cell and Tissue Research 275, 467 (Mar, 1994).	1994	insect	Drosophila	multiple	sexual selection	female
J. L. Marshall, Rapid Evolution of Spermathecal Duct Length in the Allonemobius socius Complex of Crickets: Species, Population and Wolbachia Effects. Plos One 2, (Aug, 2007).	2007	insect	Allonemobius	multiple	multiple	female
E. R. Fairn, A. I. Schulte-Hostedde, Y. Alarie, Sexual selection on accessory glands, genitalia and protarsal pads in the whirligig beetle Dineutus nigrior roberts (Coleoptera : Gyrinidae). Ethology 113, 257 (Mar, 2007).	2007	insect	Dineutus	nigrior	sexual conflict	male
Chiang RG, Chiang JA, Sarquis O, Lima MM, 2012. Morphology of reproductive accessory glands in eight species of blood-feeding Hemiptera (Hemiptera, Reduviidae) insect vectors of Chagas disease. Acta Tropica 122:196-204	2012	insect	Leptoglossus	occidentalis	none	female
R. G. Chiang, A newly discovered sperm transport system in the female of Lygaeidae bugs. Physiological Entomology 35, 87 (Mar, 2010).	2010	insect	Leptoglossus	occidentalis	sexual selection	female
E. J. Wenninger, A. L. Averill, Influence of body and genital morphology on relative male fertilization success in oriental beetle. Behavioral Ecology 17, 656 (Jul-Aug, 2006).	2006	insect	Anomala	orientalis	sexual selection	male
S. Ohno, S. Hoshizaki, Y. Ishikawa, S. Tatsuki, S. Akimoto, Allometry of male genitalia in a lepidopteran species, Ostrinia latipennis (Lepidoptera : Crambidae). Applied Entomology and Zoology 38, 313 (Aug, 2003).	2003	insect	Ostrinia	latipennis	multiple	male
M. Lang, V. Orgogozo, Distinct copulation positions in Drosophila pachea males with symmetric or asymmetric external genitalia. Contributions to Zoology 81, 87 (2012).	2012	insect	Drosophila	pachea	sexual selection	male
R. D. Briceno, W. G. Eberhard, Experimental modifications imply a stimulatory function for male tsetse fly genitalia, supporting cryptic female choice theory. Journal of Evolutionary Biology 22, 1516 (Jul, 2009).	2009	insect	Glossina	pallidipes	cryptic female choice	both
R. D. Briceno, W. G. Eberhard, A. S. Robinson, Copulation behaviour of Glossina pallidipes (Diptera : Muscidae) outside and inside the female, with a discussion of genitalic evolution. Bulletin of Entomological Research 97, 471 (Oct, 2007).	2007	insect	Glossina	pallidipes	sexual selection	both
R. D. Briceno, D. Wegrzynek, E. Chinea-Cano, W. G. Eberhard, T. D. Rolo, Movements and morphology under sexual selection: tsetse fly genitalia. Ethology Ecology & Evolution 22, 385 (2010).	2010	insect	Glossina	pallidipes	cryptic female choice	both
D. T. Gwynne, The secondary copulatory organ in female ground weta (Hemiandrus pallitarsis, Orthoptera : Anostostomatidae): a sexually selected device in females? Biological Journal of the Linnean Society 85, 463 (Aug, 2005).	2005	insect	Hemiandrus	pallitarsis	sexual selection	female
K. Ilango, Structure and function of the spermathecal complex in the phlebotomine sandfly Phlebotomus papatasi Scopoli (Diptera : Psychodidae): II. Post-copulatory histophysiological changes during the gonotrophic cycle. Journal of Biosciences 30, 733 (Dec, 2005).	2005	insect	Phlebotomus	papatasi	cryptic female choice	female
Y. Kamimura, Last-male paternity of Euborellia plebeja, an earwig with elongated genitalia and sperm-removal behavior. Journal of Ethology 23, 35 (2005).	2005	insect	Euborellia	plebeja	sperm competition	male
Y. Kamimura, R. Iwase, Evolutionary genetics of genital size and lateral asymmetry in the earwig Euborellia plebeja (Dermaptera: Anisolabididae). Biological Journal of the Linnean Society 101, 103 (Sep, 2010).	2010	insect	Euborellia	plebeja	multiple	male
Y. Kamimura, Promiscuity and elongated sperm storage organs work cooperatively as a cryptic female choice mechanism in an earwig. Animal Behaviour 85, 377 (Feb, 2013).	2013	insect	Euborellia	plebeja	sperm competition	female
A. Nava-Bolanos, A. Cordoba-Aguilar, R. Munguia-Steyer, A Test of Genital Allometry Using Two Damselfly Species does not Produce Hypoallometric Patterns. Ethology 118, 203 (Feb, 2012).	2012	insect	multiple		sperm competition	both
R. F. Preziosi, D. J. Fairbairn, Sexual size dimorphism and selection in the wild in the waterstrider Aquarius remigis: Body size, components of body size and male mating success. Journal of Evolutionary Biology 9, 317 (May, 1996).	1996	insect	Aquarius	remigis	sexual selection	male
D. J. Fairbairn, Allometry for sexual size dimorphism: Testing two hypotheses for Rensch's rule in the water strider Aquarius remigis. American Naturalist 166, S69 (Oct, 2005).	2005	insect	Aquarius	remigis	sexual selection	both
D. J. Fairbairn, R. Vermette, N. N. Kapoor, N. Zahiri, Functional morphology of sexually selected gentalia in the water strider Aquarius remigis. Canadian Journal of Zoology-Revue Canadienne De Zoologie 81, 400 (Mar, 2003).	2003	insect	Aquarius	remigis	sexual conflict	both
I. M. Ferguson, D. J. Fairbairn, Sex-specific selection and sexual size dimorphism in the waterstrider Aquarius remigis. Journal of Evolutionary Biology 13, 160 (Mar, 2000).	2000	insect	Aquarius	remigis	sexual selection	both
A. Bertin, D. J. Fairbairn, One tool, many uses: precopulatory sexual selection on genital morphology in Aquarius remigis. Journal of Evolutionary Biology 18, 949 (Jul, 2005).	2005	insect	Aquarius	remigis	sexual selection	male
A. Bertin, D. J. Fairbairn, The form of sexual selection on male genitalia cannot be inferred from within-population variance and allometry - A case study in Aquarius remigis. Evolution 61, 825 (Apr, 2007).	2007	insect	Aquarius	remigis	sexual conflict	male
Y. Kamimura, H. Mitsumoto, Lock-and-key structural isolation between sibling Drosophila species. Entomological Science 15, 197 (Apr, 2012).	2012	insect	Drosophila	santomea	lock & key	both
H. Tatsuta, S. Akimoto, Sexual differences in the pattern of spatial variation in the brachypterous grasshopper Podisma sapporensis (Orthoptera : Podisminae). Canadian Journal of Zoology-Revue Canadienne De Zoologie 76, 1450 (Aug, 1998).	1998	insect	Podisma	sapporensis	cryptic female choice	both
H. Tatsuta, S. I. A. Akimoto, Variability in phenotypic covariance structure of female genitalia in the brachypterous grasshopper Podisma sapporensis (Orthoptera : Acrididae : Podisminae). Annals of the Entomological Society of America 93, 127 (Jan, 2000).	2000	insect	Podisma	sapporensis	sexual selection	both
S. Bernstein, R. Bernstein, Allometry of male genitalia in a species of soldier beetle: Support for the one-size-fits-all hypothesis. Evolution 56, 1707 (Aug, 2002).	2002	insect	Chauliognathus	scutellaris	none	both
E. Gaino, S. Piersanti, M. Rebora, Cuticular and sensory structures on the copulatory apparatus of Rhithrogena semicolorata (Ephemeroptera: Heptageniidae). Aquatic Insects 31, 507 (2009).	2009	insect	Rhithrogena	semicolorata	sexual selection	both
F. F. Franco, I. M. Soto, F. M. Sene, M. H. Manfrin, Phenotypic Variation of the Aedeagus of Drosophila serido Vilela & Sene (Diptera: Drosophilidae). Neotropical Entomology 37, 558 (Sep-Oct, 2008).	2008	insect	Drosophila	serido	multiple	male
J. W. O. Ballard, B. Chernoff, A. C. James, Divergence of mitochondrial DNA is not corroborated by nuclear DNA, morphology, or behavior in Drosophila simulans. Evolution 56, 527 (Mar, 2002).	2002	insect	Drosophila	simulans	none	male
S. Garnier, F. Magniez-Jannin, J. Y. Rasplus, P. Alibert, When morphometry meets genetics: inferring the phylogeography of Carabus solieri using Fourier analyses of pronotum and male genitalia. Journal of Evolutionary Biology 18, 269 (Mar, 2005).	2005	insect	Carabus	solieri	lock & key	male
N. M. Andersen, A phylogenetic analysis of the evolution of sexual dimorphism and mating systems in water striders (Hemiptera: Gerridae). Biological Journal of the Linnean Society 61, 345 (Jul, 1997).	1997	insect	multiple		sexual conflict	both
G. Arnqvist, L. Rowe, Correlated evolution of male and female morphologies in water striders. Evolution 56, 936 (May, 2002).	2002	insect	multiple		sexual conflict	both
C. Cordero, J. S. Miller, On the evolution and function of caltrop cornuti in Lepidoptera - potentially damaging male genital structures transferred to females during copulation. Journal of Natural History 46, 701 (2012).	2012	insect	multiple		sexual conflict	both
T. Artiss, Structure and function of male genitalia in Libellula, Ladona and Plathemis (Anisoptera : Libellulidae). Odonatologica 30, 13 (Mar, 2001).	2001	insect	multiple		sperm competition	male
A. Cordoba-Aguilar, Possible coevolution of male and female genital form and function in a calopterygid damselfly. Journal of Evolutionary Biology 18, 132 (Jan, 2005).	2005	insect	Calopteryx	multiple	sperm competition	both
A. Cordoba-Aguilar, Seasonal variation in genital and body size, sperm displacement ability, female mating rate, and male harassment in two calopterygid damselflies (Odonata: Calopterygidae). Biological Journal of the Linnean Society 96, 815 (Apr, 2009).	2009	insect	multiple		sperm competition	both
A. Cordoba-Aguilar, E. Uhia, A. C. Rivera, Sperm competition in Odonata (Insecta): the evolution of female sperm storage and rivals' sperm displacement. Journal of Zoology 261, 381 (Dec, 2003).	2003	insect	multiple		sexual selection	both
L. Despres, E. Pettex, V. Plaisance, F. Pompanon, Speciation in the globeflower fly Chiastocheta spp. (Diptera : Anthomyiidae) in relation to host plant species, biogeography, and morphology. Molecular Phylogenetics and Evolution 22, 258 (Feb, 2002).	2002	insect	Chiastocheta	multiple	lock & key	male
W. G. Eberhard, SPECIES ISOLATION, GENITAL MECHANICS, AND THE EVOLUTION OF SPECIES-SPECIFIC GENITALIA IN 3 SPECIES OF MACRODACTYLUS BEETLES (COLEOPTERA, SCARABEIDAE, MELOLONTHINAE). Evolution 46, 1774 (Dec, 1992).	1992	insect	Macrodactylus	multiple	cryptic female choice	both
W. G. Eberhard, COPULATORY COURTSHIP AND GENITAL MECHANICS OF 3 SPECIES OF MACRODACTYLUS (COLEOPTERA SCARABAEIDAE MELOLONTHINAE). Ethology Ecology & Evolution 5, 19 (May, 1993).	1993	insect	Macrodactylus	multiple	sexual selection	both
W. G. Eberhard, COPULATORY COURTSHIP AND MORPHOLOGY OF GENITALIC COUPLING IN 7 PHYLLOPHAGA SPECIES (COLEOPTERA, MELOLONTHIDAE). Journal of Natural History 27, 683 (May-Jun, 1993).	1993	insect	Phyllophaga	multiple	cryptic female choice	both
W. G. Eberhard, Species-specific genitalic copulatory courtship in sepsid flies (Diptera, Sepsidae, Microsepsis) and theories of genitalic evolution. Evolution 55, 93 (Jan, 2001).	2001	insect	Microsepsis	multiple	cryptic female choice	both
W. G. Eberhard, N. Ramirez, Functional morphology of the male genitalia of four species of Drosophila: Failure to confirm both lock and key and male-female conflict. Annals of the Entomological Society of America 97, 1007 (Sep, 2004).	2004	insect	Drosophila	multiple	cryptic female choice	both
R. W. Flowers, W. G. Eberhard, Fitting together: copulatory linking in some Neotropical Chrysomeloidea. Revista De Biologia Tropical 54, 829 (Sep, 2006).	2006	insect	multiple		none	both
D. Forero, L. Berniker, C. Weirauch, Phylogeny and character evolution in the bee-assassins (Insecta: Heteroptera: Reduviidae). Molecular Phylogenetics and Evolution 66, 283 (Jan, 2013).	2013	insect	multiple		multiple	both
L. Dapporto, F. Strumia, The thorny subject of insular endemic taxonomy: morphometrics reveal no evidence of speciation between Coenonympha corinna and Coenonympha elbana butterflies (Lepidoptera : Nymphalidae). Zootaxa, 47 (Apr, 2008).	2008	insect	Coenonympha	multiple	lock & key	male
M. M. E. De Polanco, R. Prieto, L. F. Galindo, L. A. Lozano, M. Ordonez, Morphometric analysis in species of Drosophila (Diptera : Drosophilidae) of group repleta of semiarid Colombian ecosystems. Revista Colombiana De Entomologia 34, 105 (Jan-Jun, 2008).	2008	insect	Drosophila	multiple	lock & key	male
D. Arbuthnott, M. G. Elliot, M. A. McPeek, B. J. Crespi, Divergent patterns of diversification in courtship and genitalic characters of Timema walking-sticks. Journal of Evolutionary Biology 23, 1399 (Jul, 2010).	2010	insect	Timema	multiple	sexual selection	male
L. Bocak, T. Yagi, EVOLUTION OF MIMICRY PATTERNS IN METRIORRHYNCHUS (COLEOPTERA: LYCIDAE): THE HISTORY OF DISPERSAL AND SPECIATION IN SOUTHEAST ASIA. Evolution 64, 39 (Jan, 2010).	2010	insect	Metriorrhynchus	multiple	lock & key	male
L. Dapporto et al., Phylogenetic island disequilibrium: evidence for ongoing long-term population dynamics in two Mediterranean butterflies. Journal of Biogeography 38, 854 (May, 2011).	2011	insect	Pyronia	multiple	lock & key	male
D. Berger, S. S. Bauerfeind, W. U. Blanckenhorn, M. A. Schafer, HIGH TEMPERATURES REVEAL CRYPTIC GENETIC VARIATION IN A POLYMORPHIC FEMALE SPERM STORAGE ORGAN. Evolution 65, 2830 (Oct, 2011).	2011	insect	Scathophaga	stercoraria	multiple	female
W. U. Blanckenhorn, U. Kraushaar, C. Reim, Sexual selection on morphological and physiological traits and fluctuating asymmetry in the yellow dung fly. Journal of Evolutionary Biology 16, 903 (Sep, 2003).	2003	insect	Scathophaga	stercoraria	none	male
D. J. Hosken, E. P. Meyer, P. I. Ward, Internal female reproductive anatomy and genital interactions during copula in the yellow dung fly, Scathophaga stercoraria (Diptera : Scathophagidae). Canadian Journal of Zoology-Revue Canadienne De Zoologie 77, 1975 (Dec, 1999).	1999	insect	Scathophaga	stercoraria	sperm competition	both
C. Palestrini, A. Rolando, P. Laiolo, Allometric relationships and character evolution in Onthophagus taurus (Coleoptera : Scarabaeidae). Canadian Journal of Zoology-Revue Canadienne De Zoologie 78, 1199 (Jul, 2000).	2000	insect	Onthophagus	taurus	multiple	both
L. W. Simmons, C. M. House, J. Hunt, F. Garcia-Gonzalez, Evolutionary Response to Sexual Selection in Male Genital Morphology. Current Biology 19, 1442 (Sep, 2009).	2009	insect	Onthophagus	taurus	sexual selection	male
M. Werner, L. W. Simmons, The evolution of male genitalia: functional integration of genital sclerites in the dung beetle Onthophagus taurus. Biological Journal of the Linnean Society 93, 257 (Feb, 2008).	2008	insect	Onthophagus	taurus	sexual selection	both
A. Pizzo et al., Genetic and morphological differentiation patterns between sister species: the case of Onthophagus taurus and Onthophagus illyricus (Coleoptera, Scarabaeidae). Biological Journal of the Linnean Society 89, 197 (Oct, 2006).	2006	insect	Onthophagus	taurus	lock & key	both
L. W. Simmons, F. Garcia-Gonzalez, Experimental coevolution of male and female genital morphology. Nature Communications 2, (Jul, 2011).	2011	insect	Onthophagus	taurus	sexual selection	both
C. M. House, L. W. Simmons, Genital morphology and fertilization success in the dung beetle Onthophagus taurus: an example of sexually selected male genitalia. Proceedings of the Royal Society B-Biological Sciences 270, 447 (Mar, 2003).	2003	insect	Onthophagus	taurus	sexual selection	male
C. M. House, L. W. Simmons, The evolution of male genitalia: patterns of genetic variation and covariation in the genital sclerites of the dung beetle Onthophagus taurus. Journal of Evolutionary Biology 18, 1281 (Sep, 2005).	2005	insect	Onthophagus	taurus	sexual selection	male
C. M. House, L. W. Simmons, Offensive and defensive sperm competition roles in the dung beetle Onthophagus taurus (Coleoptera : Scarabaeidae). Behavioral Ecology and Sociobiology 60, 131 (Jun, 2006).	2006	insect	Onthophagus	taurus	sperm competition	male
C. M. House, L. W. Simmons, No evidence for condition-dependent expression of male genitalia in the dung beetle Onthophagus taurus. Journal of Evolutionary Biology 20, 1322 (Jul, 2007).	2007	insect	onthophagus	taurus	sexual selection	male
C. M. House, L. W. Simmons, The genetics of primary and secondary sexual character trade-offs in a horned beetle. Journal of Evolutionary Biology 25, 1711 (Sep, 2012).	2012	insect	Onthophagus	taurus	none	male
D. Joly, M. L. Cariou, T. Mhlanga-Mutangadura, D. Lachaise, Male terminalia variation in the rainforest dwelling Drosophila teissieri contrasts with the sperm pattern and species stability. Genetica 138, 139 (Jan, 2010).	2010	insect	Drosophila	teissieri	lock & key	male
Y. Kamimura, H. Mitsumoto, Genital coupling and copulatory wounding in Drosophila teissieri (Diptera: Drosophilidae). Canadian Journal of Zoology-Revue Canadienne De Zoologie 90, 1437 (Dec, 2012).	2012	insect	Drosophila	teissieri	lock & key	male
M. Mutanen, A. Kaitala, Genital variation in a dimorphic moth Selenia tetralunaria (Lepidoptera, Geometridae). Biological Journal of the Linnean Society 87, 297 (Feb, 2006).	2006	insect	Selenia	tetralunaria	lock & key	both
Y. Torres-Cambas, A. Cordero-Rivera, Limited spermathecal sperm removal ability in the damselfly Hypolestes trinitatis (Gundlach) (Odonata: Megapodagrionidae). International Journal of Odonatology 14, 321 (2011).	2011	insect	Hypolestes	trinitatis	sperm competition	both
D. W. Tallamy, B. E. Powell, J. A. McClafferty, Male traits under cryptic female choice in the spotted cucumber beetle (Coleoptera : Chrysomelidae). Behavioral Ecology 13, 511 (Jul-Aug, 2002).	2002	insect	Diabrotica	undecimpunctata	cryptic female choice	both
Z. B. Zeng et al., Genetic architecture of a morphological shape difference between two drosophila species. Genetics 154, 299 (Jan, 2000).	2000	insect	Drosophila	multiple	sexual selection	male
J. Ronn, M. Katvala, G. Arnqvist, Coevolution between harmful male genitalia and female resistance in seed beetles. Proceedings of the National Academy of Sciences of the United States of America 104, 10921 (Jun, 2007).	2007	insect	Callosobruchus	multiple	sexual conflict	both
T. Sota, K. Kubota, Genital lock-and-key as a selective agent against hybridization. Evolution 52, 1507 (Oct, 1998).	1998	insect	Carabus	multiple	lock & key	both
I. M. Soto, V. P. Carreira, J. J. Fanara, E. Hasson, Evolution of male genitalia: environmental and genetic factors affect genital morphology in two Drosophila sibling species and their hybrids. Bmc Evolutionary Biology 7, (May, 2007).	2007	insect	Drosophila	multiple	multiple	male
G. Schmitz, K. Reinhold, P. Wagner, Allometric relationship between genitalic size and body size in two species of mordellid beetles (Coleoptera : Mordellidae). Annals of the Entomological Society of America 93, 637 (May, 2000).	2000	insect	Mordellistena	multiple	sexual selection	male
Y. Takami, H. Suzuki, Morphological, genetic and behavioural analyses of a hybrid zone between the ground beetles Carabus lewisianus and C albrechti (Coleoptera, Carabidae): asymmetrical introgression caused by movement of the zone? Biological Journal of the Linnean Society 86, 79 (Sep, 2005).	2005	insect	Carabus	multiple	lock & key	male
A. Soulier-Perkins, The phylogeny of the Lophopidae and the impact of sexual selection and coevolutionary sexual conflict. Cladistics-the International Journal of the Willi Hennig Society 17, 56 (Mar, 2001).	2001	insect	multiple		sexual conflict	both
Y. Takami, T. Sota, Rapid diversification of male genitalia and mating strategies in Ohomopterus ground beetles. Journal of Evolutionary Biology 20, 1385 (Jul, 2007).	2007	insect	multiple		sperm competition	male
A. Soulier-Perkins, T. Bourgoin, Copulatory mechanisms and sexual selection in the Lophopidae (Hemiptera : Fulgoromorpha). Annales De La Societe Entomologique De France 34, 149 (Jun, 1998).	1998	insect	multiple		sexual selection	both
T. Usami, J. Yokoyama, K. Kubota, M. Kawata, Genital lock-and-key system and premating isolation by mate preference in carabid beetles (Carabus subgenus Ohomopterus). Biological Journal of the Linnean Society 87, 145 (Jan, 2006).	2006	insect	Carabus	multiple	lock & key	both
S. Schulmeister, Functional morphology of the male genitalia and copulation in lower Hymenoptera, with special emphasis on the Tenthredinoidea s. str. (Insecta, Hymenoptera,'Symphyta'). Acta Zoologica 82, 331 (Oct, 2001).	2001	insect	multiple		sexual selection	male
H. F. Parzer, A. P. Moczek, Rapid antagonistic coevolution between primary and secondary sexual characters in horned beetles. Evolution 62, 2423 (Sep, 2008).	2008	insect	Onthophagus	multiple	multiple	male
A. Roigalsina, THE EVOLUTION OF THE APOID-ENDOPHALLUS, ITS PHYLOGENETIC IMPLICATIONS, AND FUNCTIONAL-SIGNIFICANCE OF THE GENITAL CAPSULE (HYMENOPTERA, APOIDEA). Bollettino Di Zoologia 60, 169 (1993).	1993	insect	multiple		sexual selection	both
K. Sasakawa, K. Kubota, Phylogeny and genital evolution of carabid beetles in the genus Pterostichus and its allied genera (Coleoptera : Carabidae) inferred from two nuclear gene sequences. Annals of the Entomological Society of America 100, 100 (Mar, 2007).	2007	insect	Pterostichus	multiple	none	both
Y. Takami, T. Sota, Sperm competition promotes diversity of sperm bundles in Ohomopterus ground beetles. Naturwissenschaften 94, 543 (Jul, 2007).	2007	insect	multiple		sperm competition	male
N. J. Tatarnic, G. Cassis, Sexual coevolution in the traumatically inseminating plant bug genus Coridromius. Journal of Evolutionary Biology 23, 1321 (Jun, 2010).	2010	insect	multiple		sexual conflict	both
M. Sasabe, Y. Takami, T. Sota, The genetic basis of interspecific differences in genital morphology of closely related carabid beetles. Heredity 98, 385 (Jun, 2007).	2007	insect	multiple		none	both
M. Sasabe, Y. Takami, T. I. Sota, QTL for the species-specific male and female genital morphologies in Ohomopterus ground beetles. Molecular Ecology 19, 5231 (Dec, 2010).	2010	insect	Ohomopteru		sexual selection	both
J. L. Ronn, M. Katvala, G. Arnqvist, Correlated evolution between male and female primary reproductive characters in seed beetles. Functional Ecology 25, 634 (Jun, 2011).	2011	insect	Callosobruchus	multiple	sexual selection	female
T. Teder, Limited variability of genitalia in the genus Pimpla (Hymenoptera : Ichneumonidae): Inter- or intraspecific causes? Netherlands Journal of Zoology 48, 335 (Nov, 1998).	1998	insect	Pimpla	multiple	mechanical fit	male
K. Tsuchiya, F. Hayashi, Surgical examination of male genital function of calopterygid damselflies (Odonata). Behavioral Ecology and Sociobiology 62, 1417 (Jul, 2008).	2008	insect	multiple		sperm competition	male
H. J. Song, Species-specificity of male genitalia is characterized by shape, size, and complexity. Insect Systematics & Evolution 40, 159 (2009).	2009	insect	Schistocerca	multiple	sexual selection	male
V. Sanchez, B. E. Hernandez-Banos, C. Cordero, The Evolution of a Female Genital Trait Widely Distributed in the Lepidoptera: Comparative Evidence for an Effect of Sexual Coevolution. Plos One 6, (Aug, 2011).	2011	insect	multiple		sexual selection	female
A. Pizzo, A. L. M. Macagno, S. Dusini, C. Palestrini, Trade-off between horns and other functional traits in two Onthophagus species (Scarabaeidae, Coleoptera). Zoomorphology 131, 57 (Mar, 2012).	2012	insect	Onthophagus	multiple	none	male
L. Rowe, G. Arnqvist, SEXUAL SELECTION AND THE EVOLUTION OF GENITAL SHAPE AND COMPLEXITY IN WATER STRIDERS. Evolution 66, 40 (Jan, 2012).	2012	insect	Gerris	multiple	sexual selection	male
K. Vahed, A. W. Lehmann, J. D. J. Gilbert, G. U. C. Lehmann, Increased copulation duration before ejaculate transfer is associated with larger spermatophores, and male genital titillators, across bushcricket taxa. Journal of Evolutionary Biology 24, 1960 (Sep, 2011).	2001	insect	multiple		sexual selection	male
J. L. Ronn, C. Hotzy, Do longer genital spines in male seed beetles function as better anchors during mating? Animal Behaviour 83, 75 (Jan, 2012).	2012	insect	Callosobruchus	multiple	sexual conflict	male
I. M. Soto, Aedeagal Divergence in Sympatric Populations of Two Sibling Species of Cactophilic Drosophila (Diptera: Drosophilidae): Evidence of Character Displacement? Neotropical Entomology 41, 207 (Jun, 2012).	2012	insect	Drosophila	multiple	lock & key	male
C. P. Sanudo-Restrepo, V. Dinca, G. Talavera, R. Vila, Biogeography and systematics of Aricia butterflies (Lepidoptera, Lycaenidae). Molecular Phylogenetics and Evolution 66, 369 (Jan, 2013).	2013	insect	multiple	multiple	lock & key	male
C. M. House, J. Hunt, A. J. Moore, Sperm competition, alternative mating tactics and context-dependent fertilization success in the burying beetle, Nicrophorus vespilloides. Proceedings of the Royal Society B-Biological Sciences 274, 1309 (May, 2007).	2007	insect	Nicrophorus	vespilloides	sperm competition	male
C. W. LaMunyon, Determinants of sperm precedence in a noctuid moth Heliothis virescens: a role for male age. Ecological Entomology 26, 388 (Aug, 2001).	2001	insect	Heliothis	virescens	sperm competition	both
D. Outomuro, A. Cordero-Rivera, Allometry of secondary, primary, and nonsexual traits in the beautiful demoiselle (Calopteryx virgo meridionalis). Canadian Journal of Zoology-Revue Canadienne De Zoologie 90, 1094 (Sep, 2012).	2012	insect	Calopteryx	virgo meridionalis	sexual selection	male
A. M. Kulikov, A. I. Melnikov, N. G. Gornostaev, O. E. Lazebny, V. G. Mitrofanov, Morphometric analysis of male genitalia in sibling species of Drosophila virilis Sturt. Russian Journal of Genetics 40, 125 (Feb, 2004).	2004	insect	Drosophila	virilis	lock & key	male
C. Koshio, M. Muraji, H. Tatsuta, S. Kudo, Sexual selection in a moth: effect of symmetry on male mating success in the wild. Behavioral Ecology 18, 571 (May-Jun, 2007).	2007	insect	Elcysma	westwoodii	sexual selection	both
G. J. Ambriz, D. Mota, C. Cordero, Genetic variation in a female genital trait evolved by sexual coevolution. Genetica 139, 1241 (Oct, 2011).	2011	insect	Callophrys	xami	sexual conflict	female
Y. Kamimura, Correlated evolutionary changes in Drosophila female genitalia reduce the possible infection risk caused by male copulatory wounding. Behavioral Ecology and Sociobiology 66, 1107 (Aug, 2012).	2012	insect	Drosophila	multiple	multiple	both
E. H. Morrow, G. Arnqvist, S. Pitnick, Adaptation versus pleiotropy: why do males harm their mates? Behavioral Ecology 14, 802 (Nov, 2003).	2003	insect	multiple	multiple	sexual conflict	female
B. H. Jordal, B. C. Emerson, G. M. Hewitt, Apparent 'sympatric' speciation in ecologically similar herbivorous beetles facilitated by multiple colonizations of an island. Molecular Ecology 15, 2935 (Sep, 2006).	2006	insect	Aphanarthrum	multiple	lock & key	male
M. Mutanen, A. Kaitala, M. Monkkonen, Genital variation within and between three closely related Euxoa moth species: testing the lock-and-key hypothesis. Journal of Zoology 268, 109 (Feb, 2006).	2006	insect	Euxoa	multiple	multiple	male
K. Kawano, Developmental stability and adaptive variability of male genitalia in sexually dimorphic beetles. American Naturalist 163, 1 (Jan, 2004).	2004	insect	multiple		multiple	male
N. Nagata, K. Kubota, K. Yahiro, T. Sota, Mechanical barriers to introgressive hybridization revealed by mitochondrial introgression patterns in Ohomopterus ground beetle assemblages. Molecular Ecology 16, 4822 (Nov, 2007).	2007	insect	Ohomopterus	mutliple	lock & key	male
K. Kawano, Character displacement in stag beetles (Coleoptera : Lucanidae). Annals of the Entomological Society of America 96, 503 (Jul, 2003).	2003	insect	Odontolabis	multiple	lock & key	male
K. Kawano, Sexual dimorphism and the making of oversized male characters in beetles (Coleoptera). Annals of the Entomological Society of America 99, 327 (Mar, 2006).	2006	insect	multiple		sexual selection	male
E. J. Marquez, L. L. Knowles, Correlated evolution of multivariate traits: detecting co-divergence across multiple dimensions. Journal of Evolutionary Biology 20, 2334 (Nov, 2007).	2007	insect	mutliple		multiple	male
D. Joly, M. Schiffer, Coevolution of male and female reproductive structures in Drosophila. Genetica 138, 105 (Jan, 2010).	2010	insect	mutliple		sexual selection	both
A. S. Konstantinov, B. A. Korotyaev, Sexual dimorphism and size of aedeagi in apionid weevils (Coleoptera : apionidae) and flea beetles (Coleoptera : chrysomelidae): Why some masculine males have small aedeagi. Proceedings of the Entomological Society of Washington 106, 324 (Apr, 2004).	2004	insect	mutliple		sexual selection	male
Y. Kamimura, Possible atavisms of genitalia in two species of earwig (Dermaptera), Proreus simulans (Chelisochidae) and Euborellia plebeja (Anisolabididae). Arthropod Structure & Development 36, 361 (Sep, 2007).	2007	insect	mutliple		none	both
D. Jensen, G. J. Svenson, H. Song, M. F. Whiting, Phylogeny and evolution of male genitalia within the praying mantis genus Tenodera (Mantodea : Mantidae). Invertebrate Systematics 23, 409 (2009).	2009	insect	Tenodera	mutliple	sexual conflict	male
G. Arnqvist, Comparative evidence for the evolution of genitalia by sexual selection. Nature 393, 784 (Jun, 1998).	1998	insect	multiple		sexual selection	male
R. D. Briceno, W. G. Eberhard, Experimental demonstration of possible cryptic female choice on male tsetse fly genitalia. Journal of Insect Physiology 55, 989 (Nov, 2009).	2009	insect	Glossina	multiple	cryptic female choice	both
C. Cordero, On the function of cornuti, sclerotized structures of the endophallus of Lepidoptera. Genetica 138, 27 (Jan, 2010).	2010	insect	multiple		sexual selection	both
A. Cordoba-Aguilar, Sensory trap as the mechanism of sexual selection in a damselfly genitalic trait (Insecta : Calopterygidae). American Naturalist 160, 594 (Nov, 2002).	2002	insect	multiple		sperm competition	both
R. Dallai et al., The male and female reproductive systems of Zorotypus hubbardi Caudell, 1918 (Zoraptera). Arthropod Structure & Development 41, 337 (Jul, 2012).	2012	insect	Zorotypus	hubbard	cryptic female choice	both
W. Eberhard, Sexually antagonistic coevolution in insects is associated with only limited morphological diversity. Journal of Evolutionary Biology 19, 657 (May, 2006).	2006	insect	multiple		multiple	both
F. Hayashi, K. Tsuchiya, Functional association between female sperm storage organs and male sperm removal organs in calopterygid damselflies. Entomological Science 8, 245 (Sep, 2005).	2005	insect	multiple		sperm competition	both
M. C. Hedin, Speciational history in a diverse clade of habitat-specialized spiders (Araneae : Nesticidae : Nesticus): Inferences from geographic-based sampling. Evolution 51, 1929 (Dec, 1997).	1997	insect	multiple		lock & key	both
D. M. Higginson, K. B. Miller, K. A. Segraves, S. Pitnick, Female reproductive tract form drives the evolution of complex sperm morphology. Proceedings of the National Academy of Sciences of the United States of America 109, 4538 (Mar, 2012).	2012	insect	multiple		sperm competition	female
D. Ahrens, P. K. Lago, Directional asymmetry reversal of male copulatory organs in chafer beetles (Coleoptera : Scarabaeidae): implications on left-right polarity determination in insect terminalia. Journal of Zoological Systematics and Evolutionary Research 46, 110 (May, 2008).	2008	insect	multiple		none	male
D. Joly, N. Luck, B. Dejonghe, Adaptation to long sperm in Drosophila: Correlated development of the sperm roller and sperm packaging. Journal of Experimental Zoology Part B-Molecular and Developmental Evolution 310B, 167 (Mar, 2008).	2008	insect	Drosophila	multiple	none	male
B. Ciplak, K. G. Heller, F. Willemse, Review of the genus Eupholidoptera (Orthoptera, Tettigoniidae): different genitalia, uniform song. Zootaxa, 1 (Jul, 2009).	2009	insect	Eupholidoptera	multiple	lock & key	male
B. Ciplak, K. G. Heller, F. Willemse, Phylogeny and biogeography Eupholidoptera Maran (Orthoptera, Tettigoniidae): morphological speciation in correlation with the geographical evolution of the eastern Mediterranean. Systematic Entomology 35, 722 (Oct, 2010).	2010	insect	Eupholidoptera	multiple	multiple	male
Z. Gompert, L. K. Lucas, J. A. Fordyce, M. L. Forister, C. C. Nice, Secondary contact between Lycaeides idas and L-melissa in the Rocky Mountains: extensive admixture and a patchy hybrid zone. Molecular Ecology 19, 3171 (Aug, 2010).	2010	insect	Lycaeides	multiple	lock & key	male
J. M. Good et al., Ancient hybridization and mitochondrial capture between two species of chipmunks. Molecular Ecology 17, 1313 (Mar, 2008).	2008	mammal	Tamias	multiple	none	male
A. A. Kinahan, N. C. Bennett, L. E. Belton, P. W. Bateman, Do mating strategies determine genital allometry in African mole rats (Bathyergidae)? Journal of Zoology 274, 312 (Apr, 2008).	2008	mammal	multiple		sexual selection	both
A. S. D. Machado, A. Le Bas, M. A. Miglino, R. Leiser, P. D. Papa, Genital morphology of the male South American fur seal (Arctocephalus australis) and biological implications. Pesquisa Veterinaria Brasileira 32, 67 (Dec, 2012).	2012	mammal	Arctocephalus	australis	none	male
C. M. Drea, A. Weil, External genital morphology of the ring-tailed lemur (Lemur catta): Females are naturally "Masculinized". Journal of Morphology 269, 451 (Apr, 2008).	2008	mammal	Lemur	catta	none	both
J. F. Lemaitre, S. A. Ramm, N. Jennings, P. Stockley, Genital morphology linked to social status in the bank vole (Myodes glareolus). Behavioral Ecology and Sociobiology 66, 97 (Jan, 2012).	2012	mammal	Myodes	glareolus	sexual selection	male
E. H. Miller, L. E. Burton, It's all relative: allometry and variation in the baculum (os penis) of the harp seal, Pagophilus groenlandicus (Carnivora : Phocidae). Biological Journal of the Linnean Society 72, 345 (Mar, 2001).	2001	mammal	Pagophilus	groenlandicus	sexual selection	male
J. F. Dahl, R. D. Nadler, THE EXTERNAL GENITALIA OF FEMALE GIBBONS, HYLOBATES (H) LAR. Anatomical Record 232, 572 (Apr, 1992).	1992	mammal	Hylobates	lar	none	female
M. D. Matocq, Q. R. Shurtliff, C. R. Feldman, Phylogenetics of the woodrat genus Neotoma (Rodentia : Muridae): Implications for the evolution of phenotypic variation in male external genitalia. Molecular Phylogenetics and Evolution 42, 637 (Mar, 2007).	2007	mammal	Neotoma	multiple	lock & key	male
S. A. Ramm, Sexual selection and genital evolution in mammals: A phylogenetic analysis of baculum length. American Naturalist 169, 360 (Mar, 2007).	2007	mammal	multiple		sexual selection	male
S. A. Ramm, L. Khoo, P. Stockley, Sexual selection and the rodent baculum: an intraspecific study in the house mouse (Mus musculus domesticus). Genetica 138, 129 (Jan, 2010).	2010	mammal	Mus	musculus domesticus	other	male
S. Lupold, A. G. McElligott, D. J. Hosken, Bat genitalia: allometry, variation and good genes. Biological Journal of the Linnean Society 83, 497 (Dec, 2004).	2004	mammal	Nyctalus	noctula	sexual selection	male
W. G. Breed, C. M. Leigh, N. Speight, Coevolution of the male and female reproductive tracts in an old endemic murine rodent of Australia. Journal of Zoology 289, 94 (Feb, 2013).	2013	mammal	multiple		sexual selection	both
J. F. Dahl, SIZE AND FORM OF THE PENIS IN ORANGUTANS. Journal of Mammalogy 75, 1 (Feb, 1994).	1994	mammal	Pongo	pygmaeus	sexual selection	male
A. F. Dixson, SEXUAL SELECTION, GENITAL MORPHOLOGY, AND COPULATORY-BEHAVIOR IN MALE GALAGOS. International Journal of Primatology 10, 47 (Feb, 1989).	1989	mammal	Galago	multiple	cryptic female choice	male
A. F. Dixson, N. I. Mundy, SEXUAL-BEHAVIOR, SEXUAL SWELLING, AND PENILE EVOLUTION IN CHIMPANZEES (PAN-TROGLODYTES). Archives of Sexual Behavior 23, 267 (Jun, 1994).	1994	mammal	Pan	troglodytes	sexual selection	both
P. Stockley, Sperm competition risk and male genital anatomy: comparative evidence for reduced duration of female sexual receptivity in primates with penile spines. Evolutionary Ecology 16, 123 (2002).	2002	mammal	multiple		sexual selection	male
D. E. Tasikas, E. R. Fairn, S. Laurence, A. I. Schulte-Hostedde, Baculum variation and allometry in the muskrat (Ondatra zibethicus): a case for sexual selection. Evolutionary Ecology 23, 223 (Mar, 2009).	2009	mammal	multiple		sexual selection	male
A. I. Schulte-Hostedde, J. Bowman, K. R. Middel, Allometry of the baculum and sexual size dimorphism in American martens and fishers (Mammalia: Mustelidae). Biological Journal of the Linnean Society 104, 955 (Dec, 2011).	2011	mammal	Martes	multiple	sexual selection	male
A. A. Kinahan, N. C. Bennett, M. J. O'Riain, L. Hart, P. W. Bateman, Size matters: genital allometry in an African mole-rat (Family : Bathyergidae). Evolutionary Ecology 21, 201 (Mar, 2007).	2007	mammal	multiple		multiple	both
A. H. Harcourt, J. Gardiner, SEXUAL SELECTION AND GENITAL ANATOMY OF MALE PRIMATES. Proceedings of the Royal Society B-Biological Sciences 255, 47 (Jan, 1994).	1994	mammal	multiple		sexual selection	male
J. F. Dahl, R. D. Nadler, GENITAL SWELLING IN FEMALES OF THE MONOGAMOUS GIBBON, HYLOBATES (H) LAR. American Journal of Physical Anthropology 89, 101 (Sep, 1992).	1992	mammal	Hylobates		sexual selection	female
D. J. Hosken, K. E. Jones, K. Chipperfield, A. Dixson, Is the bat os penis sexually selected? Behavioral Ecology and Sociobiology 50, 450 (Oct, 2001).	2001	mammal	multiple		none	male
L. G. Frank, Evolution of genital masculinization: Why do female hyaenas have such a large 'penis'? Trends in Ecology & Evolution 12, 58 (Feb, 1997).	1997	mammal	Hyaena		none	female
R. Frey, PENIS LENGTH, COPULATION AND LOCOMOTION - THEIR RELATIONSHIP TO EACH OTHER IN MAMMALS .1. TESTICONDA. Zeitschrift Fur Zoologische Systematik Und Evolutionsforschung 32, 137 (Jun, 1994).	1994	mammal	multiple		none	both
A. F. Dixson, A. Pissinatti, M. J. Anderson, Observations on genital morphology and anatomy of a hybrid male muriqui (Genus Brachyteles). Folia Primatologica 75, 61 (2004).	2004	mammal	Brachyteles		sperm competition	male
H. Hofer, M. L. East, VIRILIZED SEXUAL GENITALIA AS ADAPTATIONS OF FEMALE SPOTTED HYAENAS. Revue Suisse De Zoologie 102, 895 (Dec, 1995).	1995	mammal	Hyaena	multiple	none	female
J. L. Fitzpatrick, M. Almbro, A. Gonzalez-Voyer, N. Kolm, L. W. Simmons, MALE CONTEST COMPETITION AND THE COEVOLUTION OF WEAPONRY AND TESTES IN PINNIPEDS. Evolution 66, 3595 (Nov, 2012).	2012	mammal	multiple		sperm competition	male
W. G. Eberhard et al., One size fits all? Relationships between the size and degree of variation in genitalia and other body parts in twenty species of insects and spiders. Evolution 52, 415 (Apr, 1998).	1998	multiple	multiple		cryptic female choice	both
J. Hodgkin, T. Doniach, Natural variation and copulatory plug formation in Caenorhabditis elegans. Genetics 146, 149 (May, 1997).	1997	nematode	Caenorhabditis	elegans	none	male
J. Kohler, M. Hahn, G. Kohler, Divergent evolution of hemipenial morphology in two cryptic species of mainland anoles related to Anolis polylepis. Salamandra 48, 1 (Apr, 2012).	2012	reptile	Anolis	polylepis	multiple	both
E. Lipke, P. Michalik, Formation of primary sperm conjugates in a haplogyne spider (Caponiidae, Araneae) with remarks on the evolution of sperm conjugation in spiders. Arthropod Structure & Development 41, 561 (Nov, 2012).	2012	spider	Caponina	alegre	sperm competition	male
B. A. Huber, A. P. Gonzalez, Female genital dimorphism in a spider - (Araneae : Pholcidae). Journal of Zoology 255, 301 (Nov, 2001).	2001	spider	Ciboneya	antraia	lock & key	female
S. Ghione, F. G. Costa, Female attack is not necessary for male copulatory organ breakage in the sexually cannibalistic spider Argiope argentata (Araneae: Araneidae). Journal of Arachnology 39, 197 (2011).	2011	spider	Argiope	argentata	sperm competition	both
S. H. Nessler, G. Uhl, J. M. Schneider, A non-sperm transferring genital trait under sexual selection: an experimental approach. Proceedings of the Royal Society B-Biological Sciences 274, 2337 (Sep, 2007).	2007	spider	Argiope	bruennichi	sperm competition	both
S. Nessler, G. Uhl, J. Schneider, Sexual cannibalism facilitates genital damage in Argiope lobata (Araneae: Araneidae). Behavioral Ecology and Sociobiology 63, 355 (Jan, 2009).	2009	spider	Argiope	lobata	sperm competition	male
P. Michalik, B. Knoflach, K. Thaler, G. Alberti, Live for the moment-Adaptations in the male genital system of a sexually cannibalistic spider (Theridiidae, Araneae). Tissue & Cell 42, 32 (Feb, 2010).	2010	spider	Tidarren	argo	sexual conflict	both
M. W. Foellmer, Broken genitals function as mating plugs and affect sex ratios in the orb-web spider Argiope aurantia. Evolutionary Ecology Research 10, 449 (Mar, 2008).	2008	spider	Argiope	aurantia	sperm competition	both
G. Uhl, S. H. Nessler, J. Schneider, Copulatory mechanism in a sexually cannibalistic spider with genital mutilation (Araneae : Araneidae : Argiope bruennichi). Zoology 110, 398 (2007).	2007	spider	Argiope	bruennichi	sperm competition	both
B. A. Huber, GENITAL MECHANICS AND SEXUAL SELECTION IN THE SPIDER NESTICUS-CELLULANUS (ARANEAE, NESTICIDAE). Canadian Journal of Zoology-Revue Canadienne De Zoologie 71, 2437 (Dec, 1993).	1993	spider	Nesticus	cellulanus	sexual selection	both
P. Michalik, C. C. Rittschof, A Comparative Analysis of the Morphology and Evolution of Permanent Sperm Depletion in Spiders. Plos One 6, (Jan, 2011).	2011	spider	Nephila	clavipes	multiple	male
I. A. Rodriguez-Marquez, A. V. Peretti, Intersexual cooperation during male clasping of external female genitalia in the spider Physocyclus dugesi (Araneae, Pholcidae). Journal of Ethology 28, 153 (Jan, 2010).	2010	spider	Physocyclus	dugesi	sexual selection	both
L. Fromhage, J. M. Schneider, Emasculation to plug up females: the significance of pedipalp damage in Nephila fenestrata. Behavioral Ecology 17, 353 (May-Jun, 2006).	2006	spider	Nephila	fenestrata	sperm competition	both
B. A. Huber, W. G. Eberhard, Courtship, copulation, and genital mechanics in Physocyclus globosus (Araneae, Pholcidae). Canadian Journal of Zoology-Revue Canadienne De Zoologie 75, 905 (Jun, 1997).	1997	spider	Physocyclus	globosus	sexual selection	both
L. S. E. Snow, A. Abdel-Mesih, M. C. B. Andrade, Broken copulatory organs are low-cost adaptations to sperm competition in redback spiders. Ethology 112, 379 (Apr, 2006).	2006	spider	Latrodectus	hasselti	sperm competition	both
M. Burger et al., Complex genital system of a haplogyne spider (Arachnida, Araneae, Tetrablemmidae) indicates internal fertilization and full female control over transferred sperm. Journal of Morphology 267, 166 (Feb, 2006).	2006	spider	Indicoblemma	lannaianum	cryptic female choice	both
R. Neumann, J. M. Schneider, Frequent Failure of Male Monopolization Strategies as a Cost of Female Choice in the Black Widow Spider Latrodectus tredecimguttatus. Ethology 117, 1057 (Dec, 2011).	2011	spider	Latrodectus	tredecimguttatus	sperm competition	both
M. Burger, Sperm dumping in a haplogyne spider. Journal of Zoology 273, 74 (Sep, 2007).	2007	spider	Silhouettella	loricatula	cryptic female choice	both
M. Burger, W. Graber, P. Michalik, C. Kropf, Silhouettella loricatula (Arachnida, Araneae, Oonopidae): A haplogyne spider with complex female genitalia. Journal of Morphology 267, 663 (Jun, 2006).	2006	spider	Silhouettella	loricatula	cryptic female choice	female
S. Kralj-Fiser, M. Kuntner, Eunuchs as better fighters? Naturwissenschaften 99, 95 (Feb, 2012).	2012	spider	Nephilengys	malabarensis	sexual conflict	male
P. Michalik, A. Aisenberg, R. Postiglioni, E. Lipke, Spermatozoa and spermiogenesis of the wolf spider Schizocosa malitiosa (Lycosidae, Araneae) and its functional and phylogenetic implications. Zoomorphology 132, 11 (Mar, 2013).	2012	spider	Schizocosa	malitiosa	sexual selection	male
M. Kuntner, J. A. Coddington, J. M. Schneider, INTERSEXUAL ARMS RACE? GENITAL COEVOLUTION IN NEPHILID SPIDERS (ARANEAE, NEPHILIDAE). Evolution 63, 1451 (Jun, 2009).	2009	spider	Nephila	multiple	multiple	both
W. G. Eberhard, B. A. Huber, Courtship, copulation, and sperm transfer in Leucauge mariana (araneae, tetragnathidae) with implications for higher classification. Journal of Arachnology 26, 342 (1998).	1998	spider	Leucauge	mariana	cryptic female choice	both
B. A. Huber, Evidence for functional segregation in the directionally asymmetric male genitalia of the spider Metagonia mariguitarensis (Gonzalez-Sponga) (Pholcidae : Araneae). Journal of Zoology 262, 317 (Mar, 2004).	2004	spider	Metagonia	mariguitarensis	none	both
M. Ramos, J. A. Coddington, T. E. Christenson, D. J. Irschick, Have male and female genitalia coevolved? A phylogenetic analysis of genitalic morphology and sexual size dimorphism in web-building spiders (Araneae : Araneoidea). Evolution 59, 1989 (Sep, 2005).	1989	spider	multiple	multiple	sexual selection	both
M. Segoli, Y. Lubin, A. R. Harari, Frequency and consequences of damage to male copulatory organs in a widow spider. Journal of Arachnology 36, 533 (2008).	2008	spider	Latrodectus	pallidus	sperm competition	both
M. Kuntner, M. Gregoric, S. C. Zhang, S. Kralj-Fiser, D. Q. Li, Mating Plugs in Polyandrous Giants: Which Sex Produces Them, When, How and Why? Plos One 7, (Jul, 2012).	2012	spider	Nephila	pilipes	sexual conflict	both
B. Berendonck, H. Greven, Genital structures in the entelegyne widow spider Latrodectus revivensis (Arachnida; Araneae; Theridiidae) indicate a low ability for cryptic female choice by sperm manipulation. Journal of Morphology 263, 118 (Jan, 2005).	2005	spider	Latrodectus	revivensis	sexual selection	both
M. Rezac, The spider Harpactea sadistica: co-evolution of traumatic insemination and complex female genital morphology in spiders. Proceedings of the Royal Society B-Biological Sciences 276, 2697 (Aug, 2009).	2009	spider	Harpactea	sadistica	sexual conflict	male
D. J. Hosken, T. A. R. Price, Genital Evolution: The Traumas of Sex. Current Biology 19, R519 (Jul, 2009).	2009	spider	Harpactea	sadistica	sexual conflict	male
B. A. Huber, Functional morphology of the genitalia in the spider Spermophora senoculata (Pholcidae, Araneae). Zoologischer Anzeiger 241, 105 (May, 2002).	2002	spider	Spermophora	senoculata	sexual selection	both
A. Aisenberg, F. G. Costa, M. Gonzalez, R. Postiglioni, F. Perez-Miles, Sexual dimorphism in chelicerae, forelegs and palpal traits in two burrowing wolf spiders (Araneae: Lycosidae) with sex-role reversal. Journal of Natural History 44, 1189 (2010).	2010	spider	Allocosa	multiple	none	both
L. E. Costa-Schmidt, A. M. de Araujo, Sexual dimorphism in chelicerae size in three species of nuptial-gift spiders: a discussion of possible functions and driving selective forces. Journal of Zoology 275, 307 (Jul, 2008).	2008	spider	Paratrechalea	multiple	sexual selection	both
L. E. Costa-Schmidt, A. M. de Araujo, Genitalic variation and taxonomic discrimination in the semi-aquatic spider genus Paratrechalea (Araneae: Trechaleidae). Journal of Arachnology 38, 242 (2010).	2010	spider	Paratrechalea	multiple	lock & key	both
S. C. Crews, Assessment of rampant genitalic variation in the spider genus Homalonychus (Araneae, Homalonychidae). Invertebrate Biology 128, 107 (2009).	2009	spider	Homalonychus	multiple	multiple	both
C. De Busschere, L. Baert, S. M. Van Belleghem, W. Dekoninck, F. Hendrickx, Parallel phenotypic evolution in a wolf spider radiation on Galapagos. Biological Journal of the Linnean Society 106, 123 (May, 2012).	2012	spider	Hogna	multiple	multiple	male
S. Funke, B. A. Huber, Allometry of genitalia and fighting structures in Linyphia triangularis (Araneae, Linyphiidae). Journal of Arachnology 33, 870 (2005).	2005	spider	Linyphia	triangularis	sexual selection	both
P. Michalik, W. Reiher, M. Tintelnot-Suhm, F. A. Coyle, G. Alberti, Female genital system of the folding-trapdoor spider Antrodiaetus unicolor (Hentz, 1842) (Antrodiaetidae, Araneae): Ultrastructural study of form and function with notes on reproductive biology of spiders. Journal of Morphology 263, 284 (Mar, 2005).	2005	spider	Antrodiaetus	unicolor	cryptic female choice	female
B. A. Huber, Cryptic female exaggeration: The asymmetric female internal genitalia of Kaliana yuruani (Araneae : Phoicidae). Journal of Morphology 267, 705 (Jun, 2006).	2006	spider	Kaliana	yuruani	sexual selection	both
J. A. Miller, Repeated evolution of male sacrifice behavior in spiders correlated with genital mutilation. Evolution 61, 1301 (Jun, 2007).	2007	spider	multiple		sexual conflict	male
B. A. Huber, Sexual selection in pholcid spiders (Araneae, Pholcidae): Artful chelicerae and forceful genitalia. Journal of Arachnology 27, 135 (1999).	1999	spider	multiple		sexual selection	both
M. Kuntner, S. Kralj-Fiser, J. M. Schneider, D. Li, Mate plugging via genital mutilation in nephilid spiders: an evolutionary hypothesis. Journal of Zoology 277, 257 (Apr, 2009).	2012	spider	multiple		multiple	both
B. A. Huber, THE RETROLATERAL TIBIAL APOPHYSIS IN SPIDERS - SHAPED BY SEXUAL SELECTION. Zoological Journal of the Linnean Society 113, 151 (Feb, 1995).	1995	spider	multiple		sexual selection	both
B. A. Huber, A. D. Brescovit, C. A. Rheims, Exaggerated female genitalia in two new spider species (Araneae : Pholcidae), with comments on genital evolution by female choice versus antagonistic coevolution. Insect Systematics & Evolution 36, 285 (2005).	2005	spider	Mesabolivar	multiple	multiple	both
B. A. Huber, C. A. Rheims, A. D. Brescovit, Speciation without changes in genital shape: A case study on Brazilian pholcid spiders (Araneae : Pholcidae). Zoologischer Anzeiger 243, 273 (Jun, 2005).	2005	spider	Psilochorus	mutliple	lock & key	male
M. Burger, Female genitalia of goblin spiders (Arachnida: Araneae: Oonopidae): a morphological study with functional implications. Invertebrate Biology 128, 340 (2009).	2009	spider	multiple		cryptic female choice	both
M. Burger, Complex female genitalia indicate sperm dumping in armored goblin spiders (Arachnids, Araneae, Oonopidae). Zoology 113, 19 (Jan, 2010).	2010	spider	multiple		cryptic female choice	both
M. Burger, Functional morphology of female goblin spider genitalia (Arachnida: Araneae: Oonopidae) with notes on fertilization in spiders. Zoologischer Anzeiger 250, 123 (2011).	2011	spider	multiple		cryptic female choice	female
M. Burger, Structure and function of the female reproductive system in three species of goblin spiders (Arachnida: Araneae: Oonopidae). Invertebrate Biology 130, 148 (2011).	2011	spider	multiple		cryptic female choice	both
M. Burger, M. Izquierdo, P. Carrera, Female genital morphology and mating behavior of Orchestina (Arachnida: Araneae: Oonopidae). Zoology 113, 100 (Mar, 2010).	2010	spider	Orchestina	multiple	sperm competition	female
